# Supplementary material for: A clear coat from a water soluble precursor: a bioinspired paint concept
Source: Royal Society of Chemistry journal article supplement (doi:10.1039/c5ta09437b), 2016-01-01
Supplement: c5ta09437b1.pdf [file c5ta09437b1.pdf]

Electronic Supplementary Information

A clear coat from a water soluble precursor: a bioinspired paint concept

*Juan Yang, Inge Bos, Wim Pranger, Anthonie Stuiver, Aldrik Velders, Martien A. Cohen Stuart,*

*Marleen Kamperman*

Figure S1.  $^1\text{H}$  NMR spectra of poly(methyl-DAA-AEMA) in a mixture of MeOD/  $\text{D}_2\text{O}$ . The cross symbol 'x' in the spectra indicates the protons attributed to MeOD

Figure S2. UV-vis spectra of DAA-*p* in Milli-Q water (red line) and P(DAA-*co*-AEMA) in 0.1 M HCl aqueous solution (black line)

Figure S3. Pictures of P(DAA-*co*-AEMA), prepared at high pH, coated on polystyrene (left) and on stainless steel (right)

Figure S4. UV-vis spectra of a P(DAA-*co*-AEMA) film prepared at high pH on a quartz slide at different time points

Figure S5. Viscosity of PAEMA at different pH values as a function of shear rate

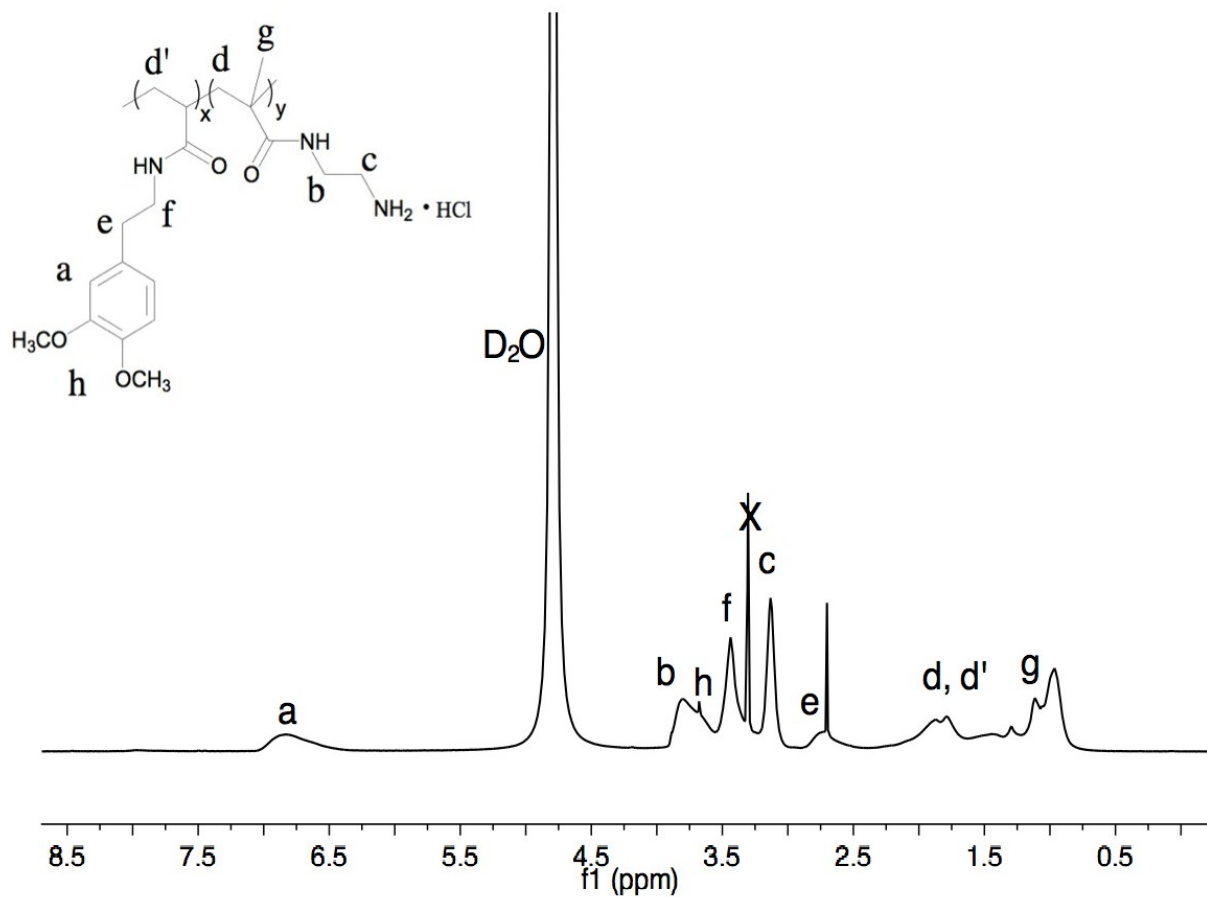

Figure S1. <sup>1</sup>H NMR spectra of poly(methyl-DAA-AEMA) in a mixture of MeOD/ D<sub>2</sub>O. The cross symbol 'x' in the spectra indicates the protons attributed to MeOD

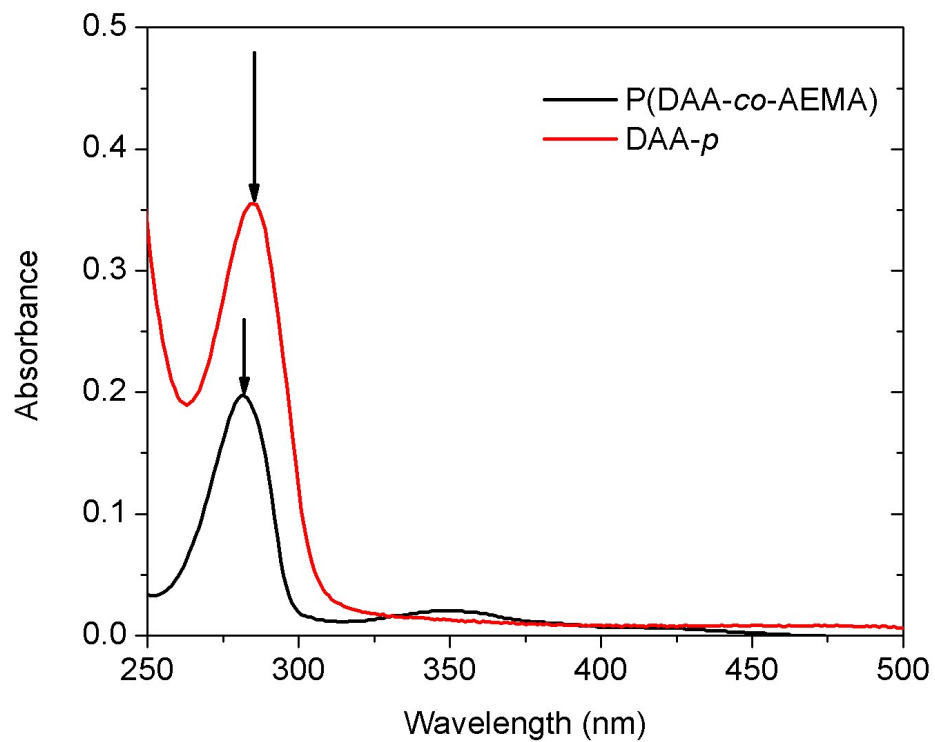

Figure S2. UV-vis spectra of DAA-*p* in Milli-Q water (red line) and P(DAA-*co*-AEMA) in 0.1 M HCl aqueous solution (black line)

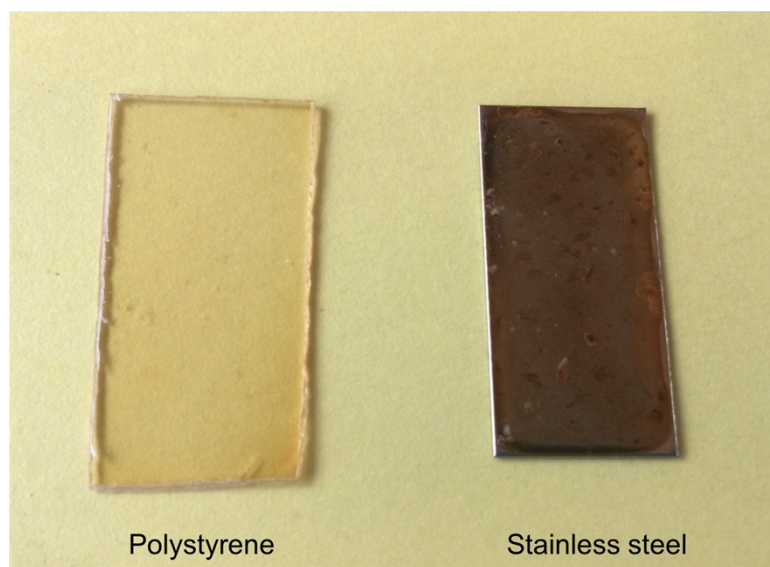

Figure S3. Pictures of P(DAA-*co*-AEMA), prepared at high pH, coated on polystyrene (left) and on stainless steel (right)

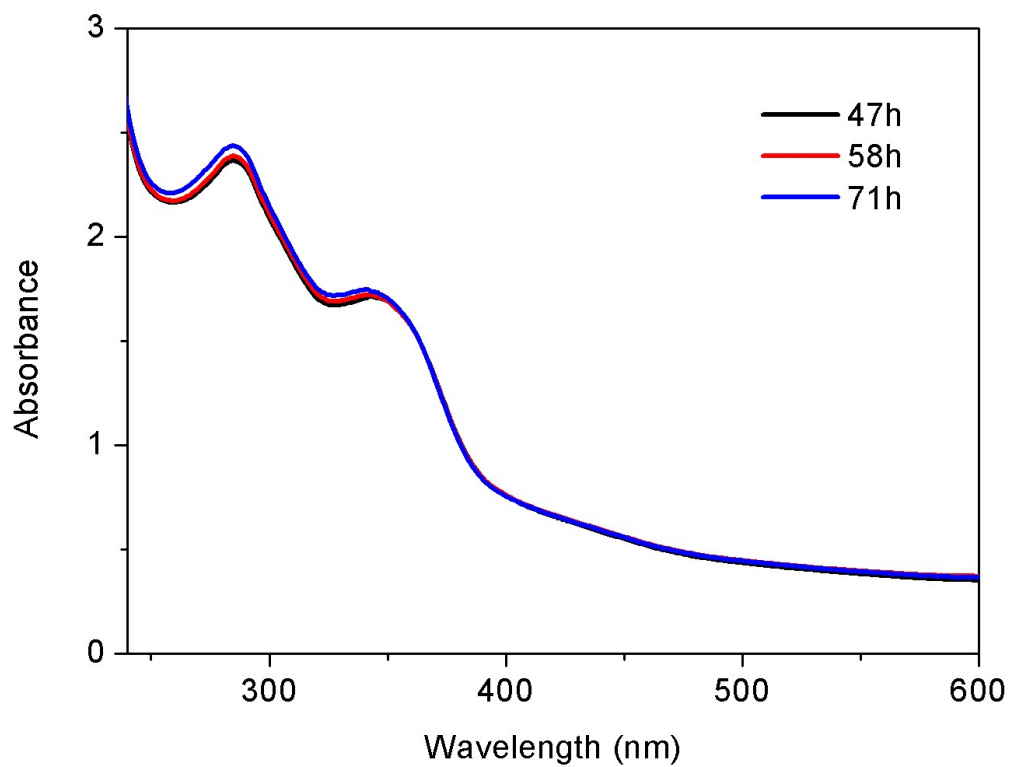

Figure S4. UV-vis spectra of a P(DAA-co-AEMA) film prepared at high pH on a quartz slide at different time points

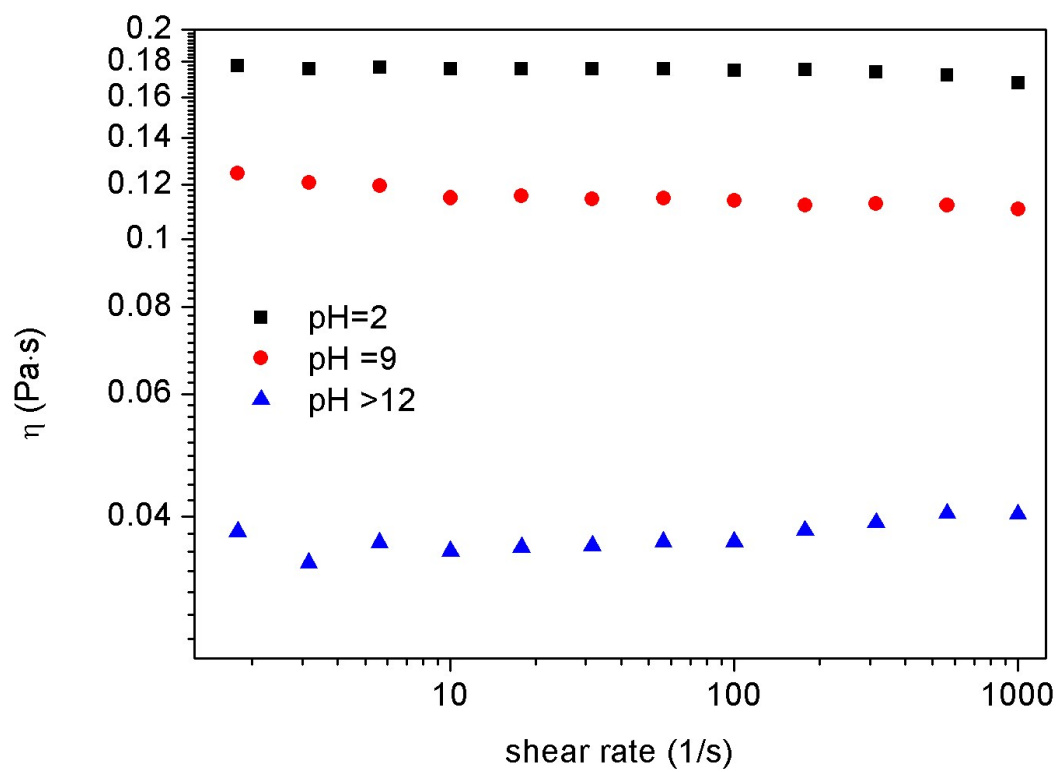

Figure S5. Viscosity of PAEMA at different pH values as a function of shear rate
